# Supplementary material for: CsMYB60 is a key regulator of flavonols and proanthocyanidans that determine the colour of fruit spines in cucumber
Source: PubMed Central journal article supplement (PMC6305189; doi:10.1093/jxb/ery336), 2018-09-26
Supplement: ery336_suppl_supplementary_figures_s1-s12_tables_s1-s3.pdf [file ery336_suppl_supplementary_figures_s1-s12_tables_s1-s3.pdf]

***CsMYB60* is a key regulator of flavonols and proanthocyanidans that determine the colour of fruit spines in cucumber**

*Mengyu Li, Cunjia Zhan, Lixin Dua, QianQian Luan, Jialin Li, Aigang Yang, Xiaoquan Qi and Zhonghai Ren*

**SUPPLEMENTARY DATA**

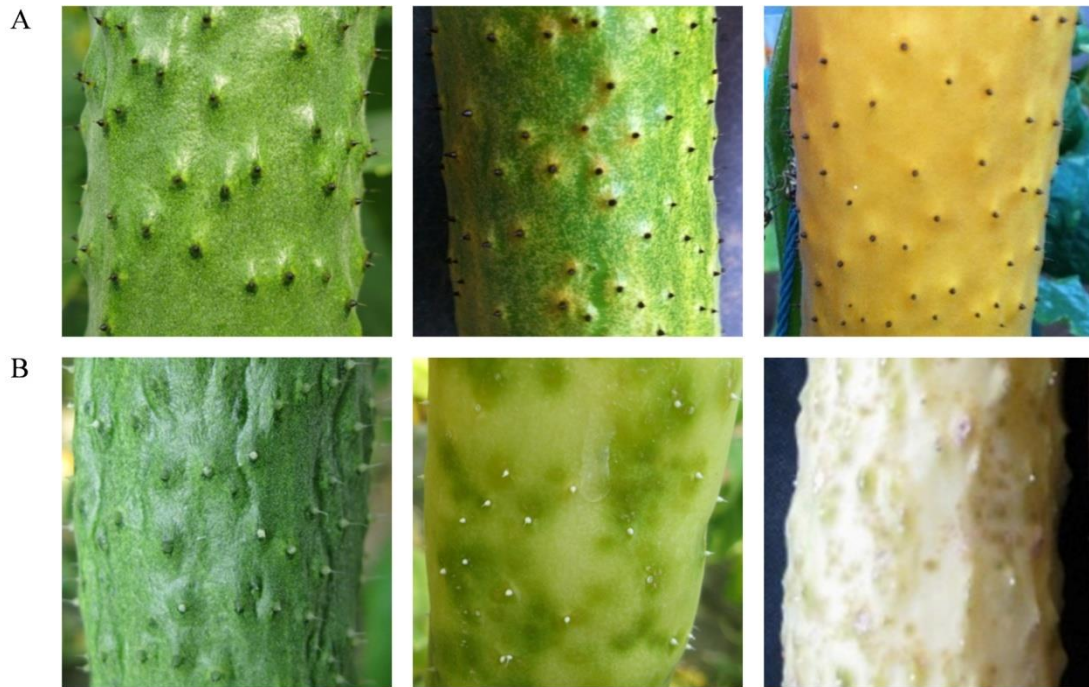

**Figure S1. Comparison of fruit skin colour between white-spined RNS8 and black-spined RNS9 at different developmental stages. (A) The fruit of RNS9. From left to right, the development stages are 15DAA, 25DAA, and 40DAA. (B) The fruit of RNS8. From left to right, the development stages are 15DAA, 25DAA, and 40DAA.**

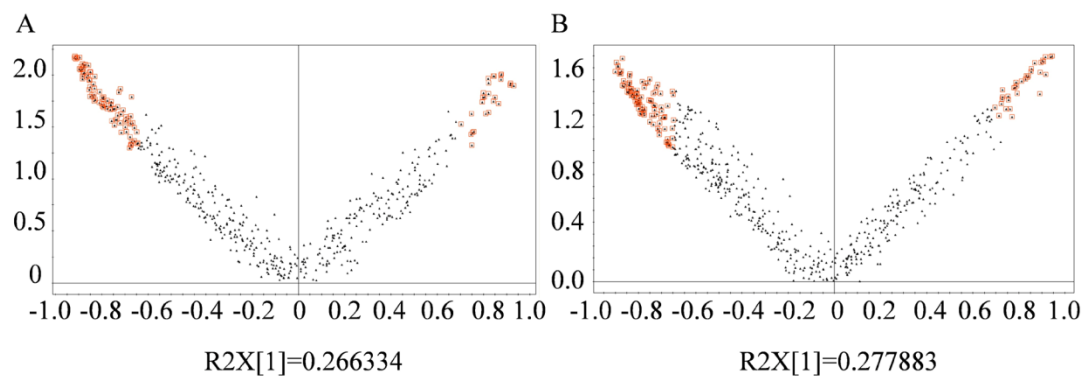

**Figure S2. Different metabolites between black and white spines at 2DAA and 12DAA.** (A) Different metabolites between black and white spines at 2DAA. (B) Different metabolites between black and white spines at 12DAA. Red boxes represent different metabolites. Ordinate values represent the Variable Importance for the Projection (VIP). Abscissa values represent coefficients (p(corr)). The screening criteria is  $VIP > 1$  and  $p(\text{corr}) > 0.7$  or  $< -0.7$ .

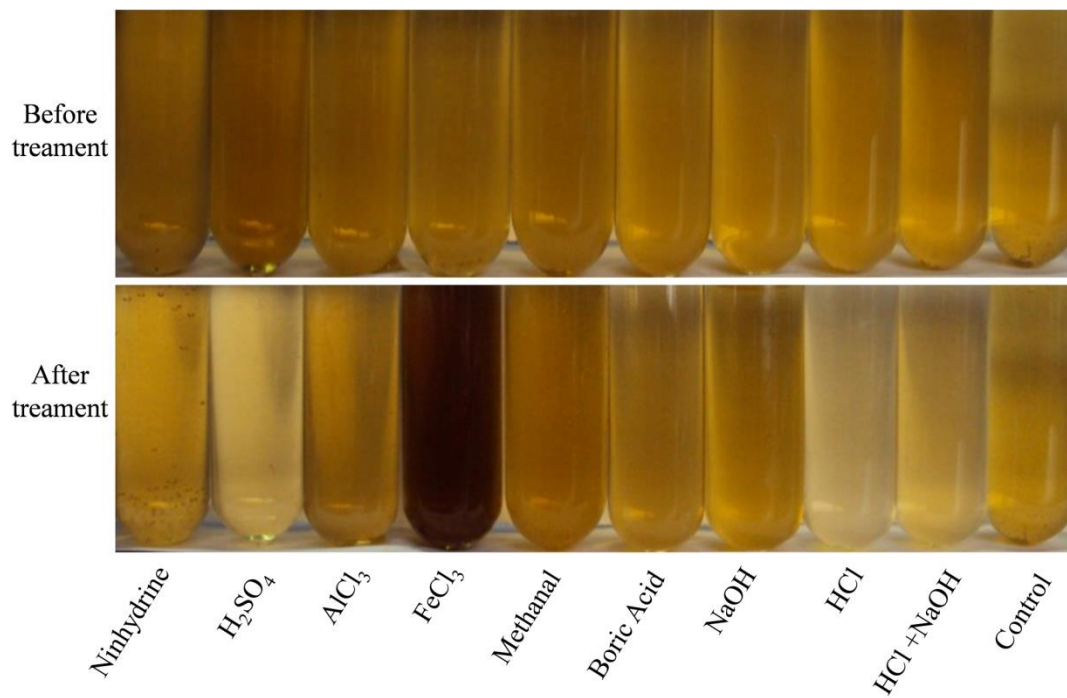

**Figure S3. Preliminary chromatic test of the compounds in black spines using ninhydrine,  $H_2SO_4$ ,  $AlCl_3$ ,  $FeCl_3$ , methanal, boric acid, NaOH, HCl, and HCl + NaOH.**

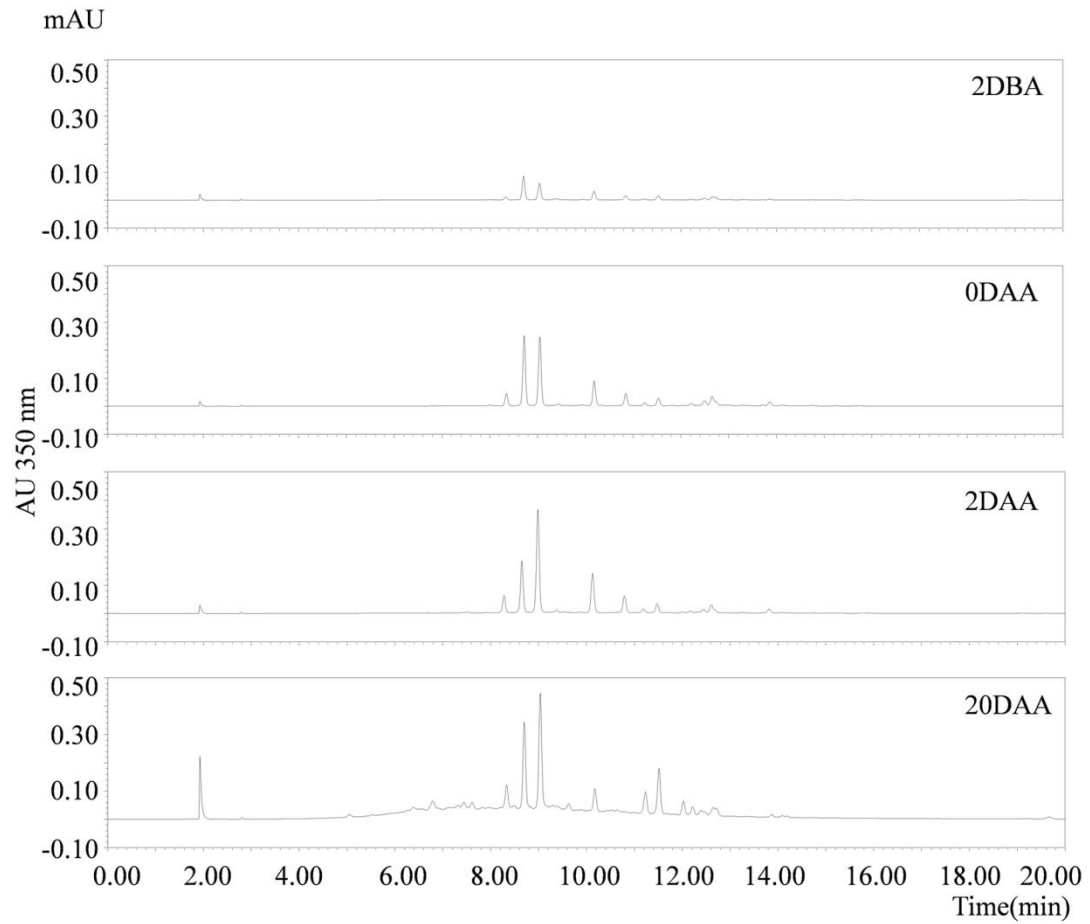

**Figure S4. Accumulation of flavonols in black spines at different developmental stages.** 2 DBA: 2 days before anthesis. 0 DAA: 0 days after anthesis. 2 DAA: 2 days after anthesis. 20 DAA: 20 days after anthesis.

**Figure S5.** The NMR Physicochemical and Spectral for the metabolites initially labelled as substances A–E.

**Quercetin-3-O-rutinoside-7-O-glucose** (Averett and Mabry, 1971): Light yellow powder, UV (MeOH),  $\lambda_{\max}$  213, 272, 337nm. ESI-MS m/z: 771.4, [M-H]<sup>-</sup>. formular: C<sub>33</sub>H<sub>40</sub>O<sub>21</sub> <sup>1</sup>H-NMR (400 MHz, DMSO-d<sub>6</sub>)  $\delta$ : 7.52 (d, J=2.4 Hz, H-2'), 6.83 (d, J = 8.4 Hz, H-5'), 7.65 (dd, J=8.4, 2.4 Hz, H-6'), 6.39 (d, J = 2.0 Hz, H-8), 6.18 (d, J = 2.0 Hz, H-6), 5.46 (d, J=7.6 Hz, H-1''), 5.32 (d, J=7.6 Hz, H-1'''), 4.41 (brs, H-1'''), 0.95 (3H, d, J=6 Hz, Me-6'''); <sup>13</sup>C-NMR (100 MHz, DMSO-d<sub>6</sub>)  $\delta$ : 156.5(C-2), 133.4(C-3), 177.5(C-4), 161.4(C-5), 98.9(C-6), 164.6(C-7), 93.7(C-8), 156.2(C-9), 103.9(C-10), 121.3(C-1'), 116.1(C-2'), 148.7(C-3'), 145.0(C-4'), 115.3(C-5'), 122.1(C-6'), 101.0(C-1''), 74.2(C-2''), 76.6(C-3''), 70.8(C-4''), 76.0(C-5''), 65.2(C-6''), 100.1(C-1'''), 70.6(C-2'''), 70.1(C-3'''), 72.1(C-4'''), 68.2(C-5'''), 18.1(C-6'''), 100.1(C-1''''), 73.2(C-2''''), 76.6(C-3''''), 70.1(C-4''''), 77.7(C-5''''), 61.1(C-6'''').

**Kempferol-3-O-rutinoside 7-O-glucoside** (Budzianowski, 1990; Qu *et al.*, 2011): Light yellow powder, UV (MeOH),  $\lambda_{\max}$  217, 270, 340nm. ESI-MS m/z: 755.4 [M-H]<sup>-</sup>, formular: C<sub>33</sub>H<sub>40</sub>O<sub>20</sub>. <sup>1</sup>H-NMR (400 MHz, DMSO-d<sub>6</sub>)  $\delta$ : 6.18 (1H, d, J = 2.0 Hz, H-6), 6.40 (1H, d, J = 2.0 Hz, H-8), 7.96 (2H, d, J = 8.5 Hz, H-2', 6'), 6.88 (2H, d, J = 8.5 Hz, H-3', 5'), 5.48 (1H, d, J = 7.2 Hz, H-1''), 5.03 (1H, d, J = 7.0 Hz, H-1'''), 4.45 (1H, s, H-1'''), 1.02 (3H, d, J = 6.2 Hz, H-6'''). <sup>13</sup>C-NMR (100 MHz, DMSO-d<sub>6</sub>)  $\delta$ : 157.0 (C-2), 133.0(C-3), 177.6 (C-4), 159.9 (C-5), 98.2 (C-6), 162.8(C-7), 94.6 (C-8), 156.2 (C-9), 104.9 (C-10), 120.8(C-1'), 130.8 (C-2', 6'), 159.3 (C-4'), 115.1 (C-3', 5'), 101.4 (C-1''), 74.5 (C-2''), 76.4 (C-3''), 70.5 (C-4''), 75.2 (C-5''), 66.2 (C-6''), 100.7 (C-1'''), 70.7 (C-2'''), 69.5 (C-3'''), 71.7 (C-4'''), 68.9 (C-5'''), 17.3 (C-6'''), 100.0 (C-1''''), 73.5 (C-2''''), 76.1 (C-3''''), 69.0 (C-4''''), 76.5 (C-5''''), 60.1 (C-6'''').

**Isorhamnetin-3-O-rutinoside-7-O-glucoside** (Parker and Bohm, 1975; Ito *et al.*, 2000): Light yellow powder, UV (MeOH),  $\lambda_{\max}$  213, 272, 337nm. ESI-MS m/z: 785.2, [M-H]<sup>-</sup>, formular: C<sub>34</sub>H<sub>42</sub>O<sub>21</sub>, <sup>1</sup>H NMR (DMSO-d<sub>6</sub>): d 7.88 (1H, d, J=2 Hz, H-2'), 7.56 (1H, dd, J=2, 8 Hz, H-6'), 6.94 (1H, d, J=8 Hz, H-5'), 6.65 (1H, s, H-6), 5.43 (1H, d, J=8 Hz, H-1''), 5.06 (1H, d, J=7:5 Hz, H-1'''), 4.39 (1H, br s, H-1'''), 3.83 (3H, s, 3'-OMe), 0.95 (3H, d, J . 6 Hz, H-6'''). <sup>13</sup>C-NMR (100 MHz, DMSO-d<sub>6</sub>)  $\delta$ : 157.4 (C-2),

132.7 (C-3), 176.8(C-4), 160.5 (C-5), 99.2 (C-6), 161.9 (C-7), 94.9 (C-8),156.2 (C-9), 105.9 (C-10), 121.2 (C-1'), 113.3 (C-2'),147.1 (C-3'), 148.3 (C-4'), 115.6 (C-5'), 122.5 (C-6'), 55.7(C-3'-OMe),101.4 (C-1''), 74.5 (C-2''), 76.8(C-3''), 70.3 (C-4''),76.1 (C-5''), 67.2 (C-6''), 101.1 (C-1'''), 70.5 (C-2'''),70.8 (C-3'''), 71.9 (C-4'''), 68.4 (C-5'''), 17.9 (C-6'''),100.4(C-1'''), 73.4 (C-2'''), 77.4 (C-3'''), 69.8 (C-4'''),76.5 (C-5'''), 61.5 (C-6''').

**Kaempferol-3-O-rutinoside** (Markham *et al.*, 1978; Wang *et al.*, 2006): Light yellow powder, UV (MeOH),  $\lambda_{\max}$  214, 276, 342nm. ESI-MS m/z: 593.2, [M-H]<sup>-</sup>, formula: C<sub>27</sub>H<sub>30</sub>O<sub>15</sub>. <sup>1</sup>H-NMR (400 MHz, DMSO-*d*<sub>6</sub>)  $\delta$ : 12.57(1H, s, 5-OH), 6.20(1H, d, J = 2.00 Hz, H-6), 6.40(1H, d, J = 2.00 Hz, H-8), 7.96(2H, dd, J = 2.04, 8.36 Hz, H-2', 6'), 6.87(2H, dd, J = 2.04, 8.36 Hz, H-3', 5'), 5.29(1H, d, J = 7.80 Hz, H-1''), 4.42(1H, s, H-1'''), 0.89(3H, d, J = 6.04 Hz, H-6'''); <sup>13</sup>C-NMR (100 MHz, DMSO-*d*<sub>6</sub>)  $\delta$ : 157.1(C-2), 133.3(C-3), 177.8(C-4), 160.6(C-5),98.7(C-6), 164.4(C-7), 93.8(C-8), 156.5(C-9), 103.8(C-10), 120.8(C-1'), 130.6(C-2', 6'), 116.3(C-3', 5'), 159.9(C-4'), 101.4(C-1''), 74.2(C-2''), 76.4(C-3''),70.3(C-4''), 76.0(C-5''), 66.5(C-6''), 100.6(C-1'''), 70.5(C-2'''), 70.4(C-3'''),71.6(C-4'''), 68.3(C-5'''), 18.0(C-6''').

**Isorhamnetin-3-O-rutinoside** (Wen *et al.*, 2013): Light yellow powder, UV (MeOH),  $\lambda_{\max}$  218, 270, 340nm. ESI-MS m/z: 623.2, [M-H]<sup>-</sup>, formula: C<sub>28</sub>H<sub>32</sub>O<sub>16</sub>, <sup>1</sup>H-NMR(400 MHz, DMSO-*d*<sub>6</sub>)  $\delta$ : DMSO-*d*<sub>6</sub>)  $\delta$ : 12.56 (s, 5-OH), 7.85 (d, J = 2.4 Hz, H-2'), 6.90 (d, J = 8.4 Hz, H-5'), 7.51 (dd, J = 8.4, 2.4 Hz, H-6'), 6.42 (d, J = 2.0 Hz, H-8), 6.18 (d, J = 2.0 Hz, H-6), 3.83 (3H, s, 3'-OMe), 5.43 (d, J = 7.2 Hz, H-1''), 5.38 (d, J = 3.2 Hz, H-1'''), 0.97 (3H, d, J = 6.0 Hz, H-6'''); <sup>13</sup>C-NMR(100 MHz, DMSO-*d*<sub>6</sub>)  $\delta$ : 156.3 (C-2), 132.7 (C-3), 176.8(C-4), 160.5 (C-5), 98.7 (C-6), 164.3 (C-7), 93.5 (C-8),156.2 (C-9), 103.9 (C-10), 120.9 (C-1'), 115.0 (C-2'),149.2 (C-3'), 146.7 (C-4'), 113.1 (C-5'), 122.1 (C-6'), 55.5(C-3'-OMe), 101.0 (C-1''), 74.4 (C-2''), 76.4 (C-3''), 70.1(C-4''), 75.8 (C-5''), 66.7 (C-6''), 100.1(C-1'''), 70.6 (C-2'''), 70.5 (C-3'''), 71.9(C-4'''), 68.7 (C-5'''), 17.5 (C-6''').

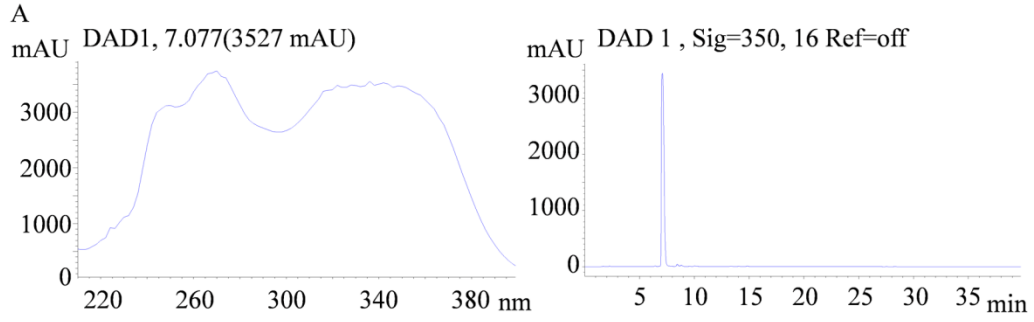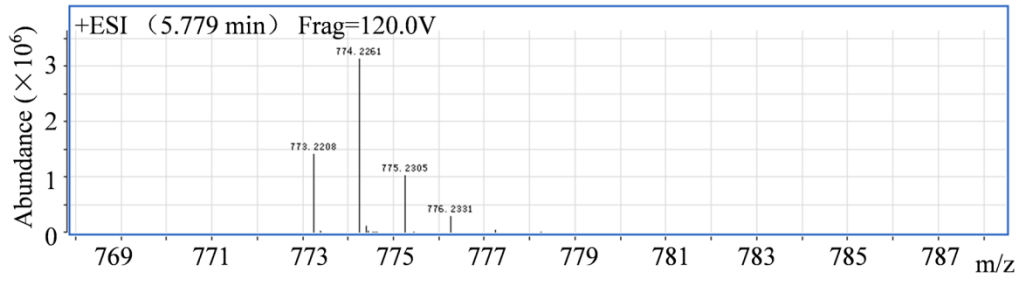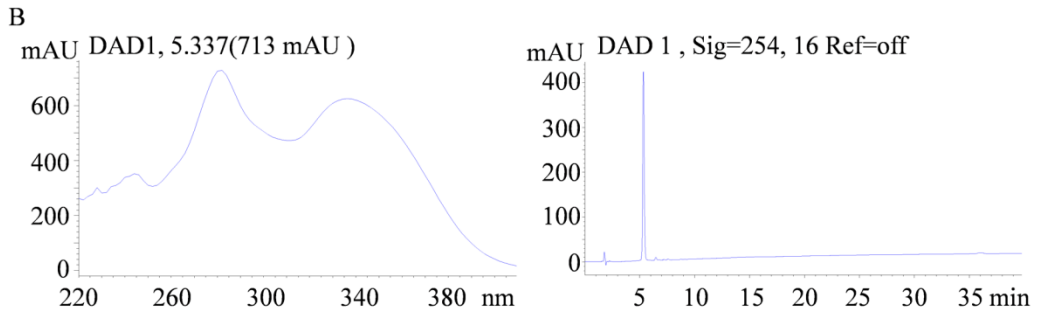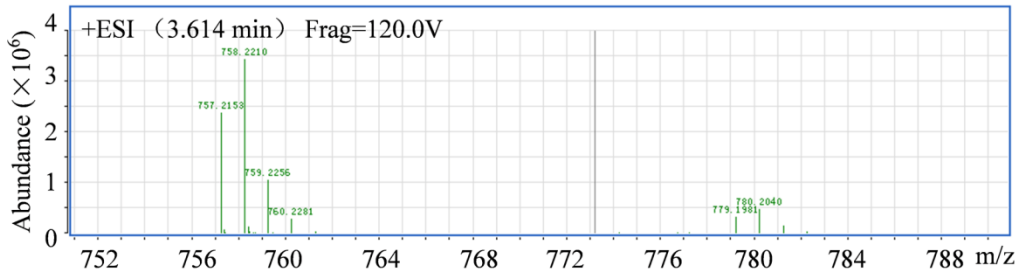

C

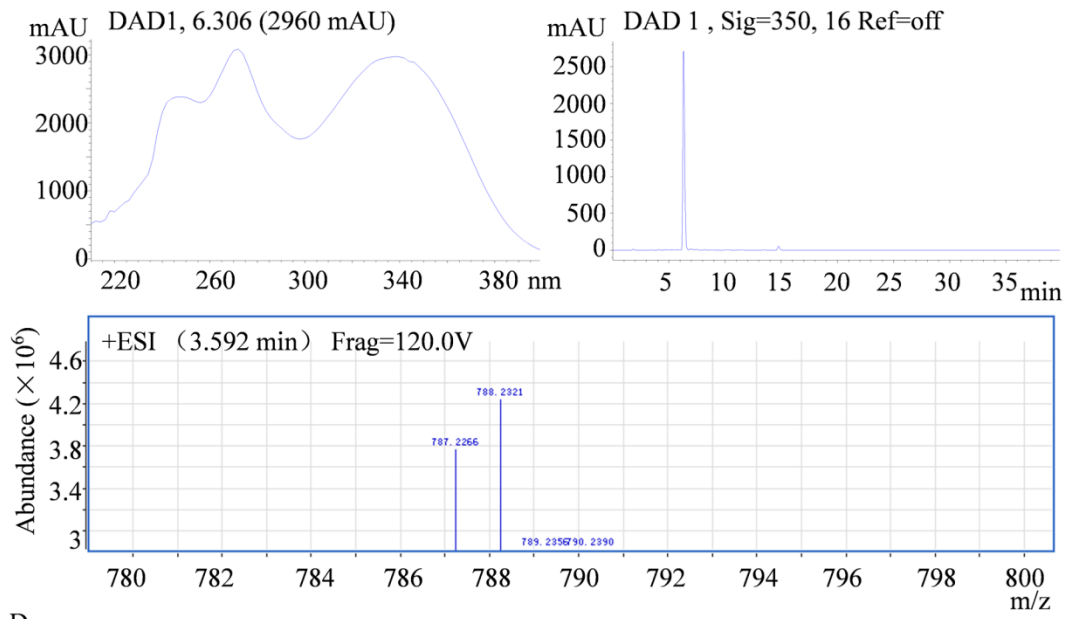

D

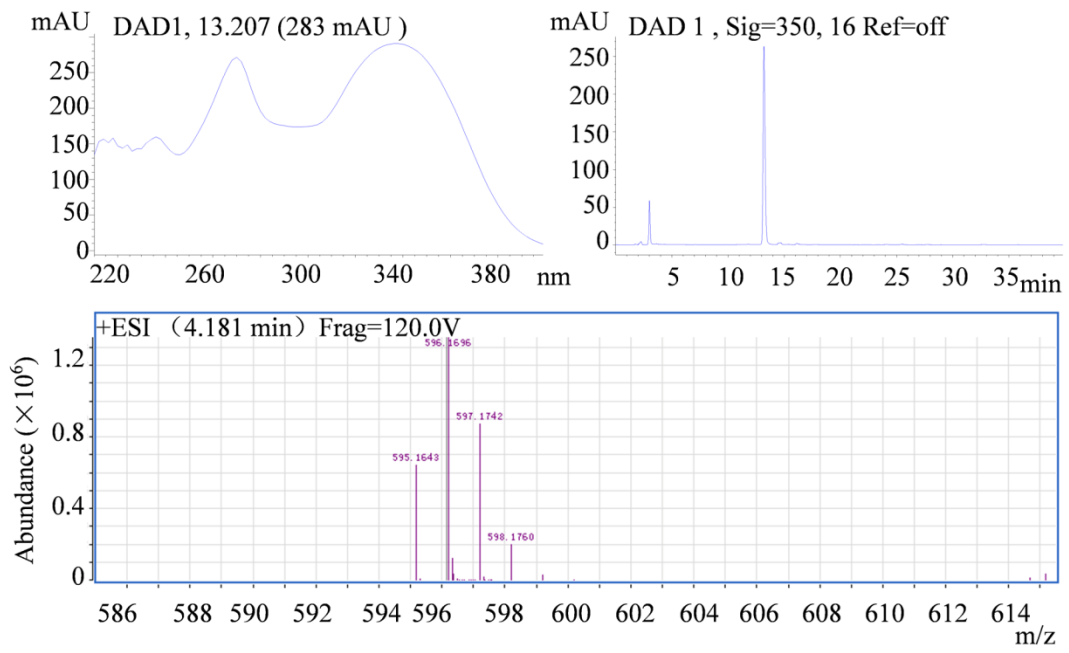



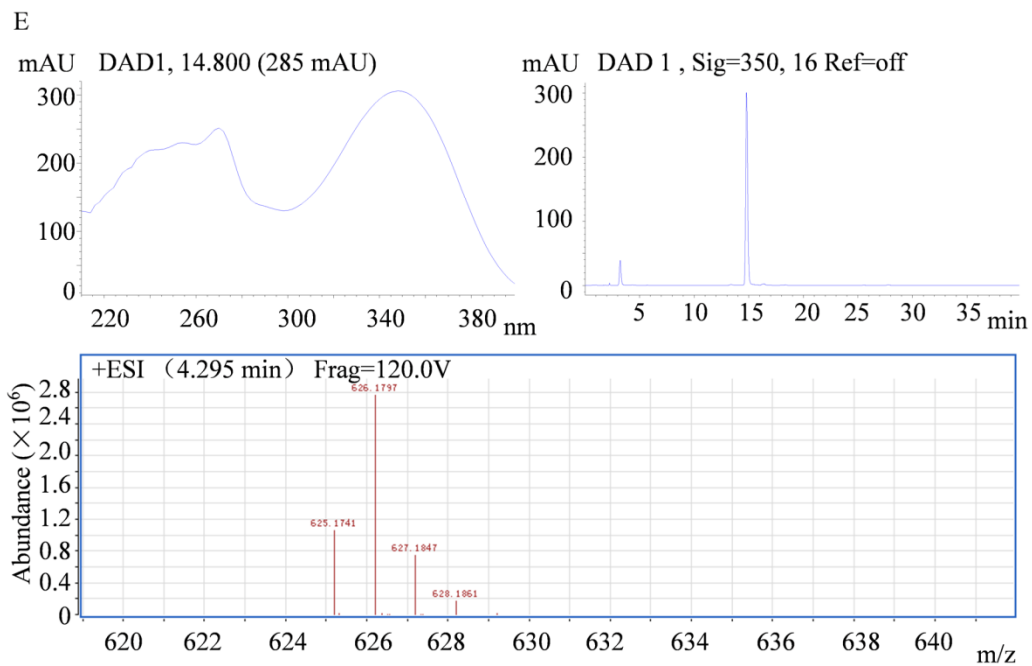

**Figure S6. Ultraviolet absorption spectrum, high-performance liquid chromatography and high-resolution mass spectrometry data for the five metabolites A–E. (A) A:  $C_{33}H_{40}O_{21}$ . (B) B:  $C_{33}H_{40}O_{20}$ . (C) C:  $C_{34}H_{42}O_{21}$ . (D) D:  $C_{27}H_{30}O_{15}$ . (E) E:  $C_{28}H_{32}O_{16}$ .**

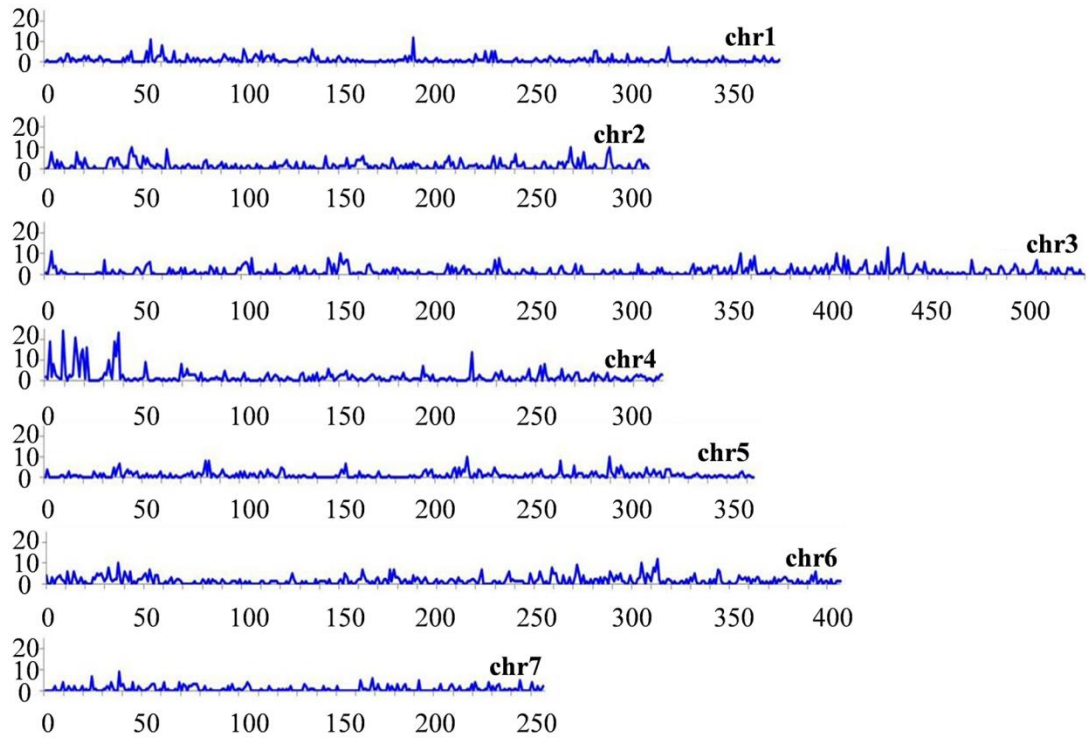

**Figure S7. SNP association at the *B* locus.** White and black spine groups from the F2 population derived from a cross between RNS8 and RNS9 were used for RNA-seq, and the resultant SNPs were used for association analysis.

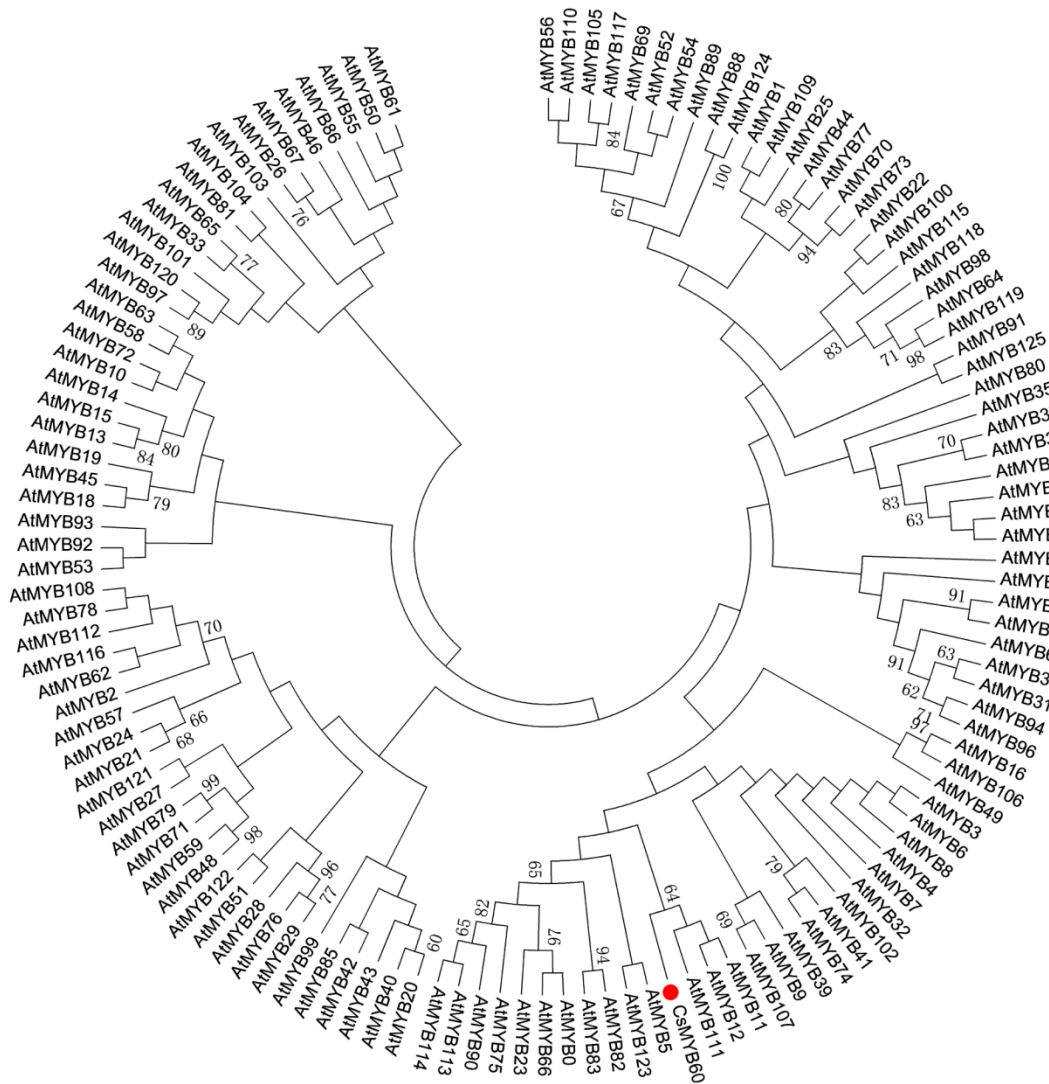

**Fig S8. Phylogenetic analysis of CsMYB60.** The neighbor-joining tree includes CsMYB60 and 126 R2R3MYB proteins from Arabidopsis. CsMYB60 is highlighted with red circle. The phylogenetic tree was constructed with MEGA5 using a bootstrap test of phylogeny with UPGMA test and default parameters. The numbers above or below branches indicate bootstrap values (>50%) from 1000 replicates.

A  RNS8  RNS9

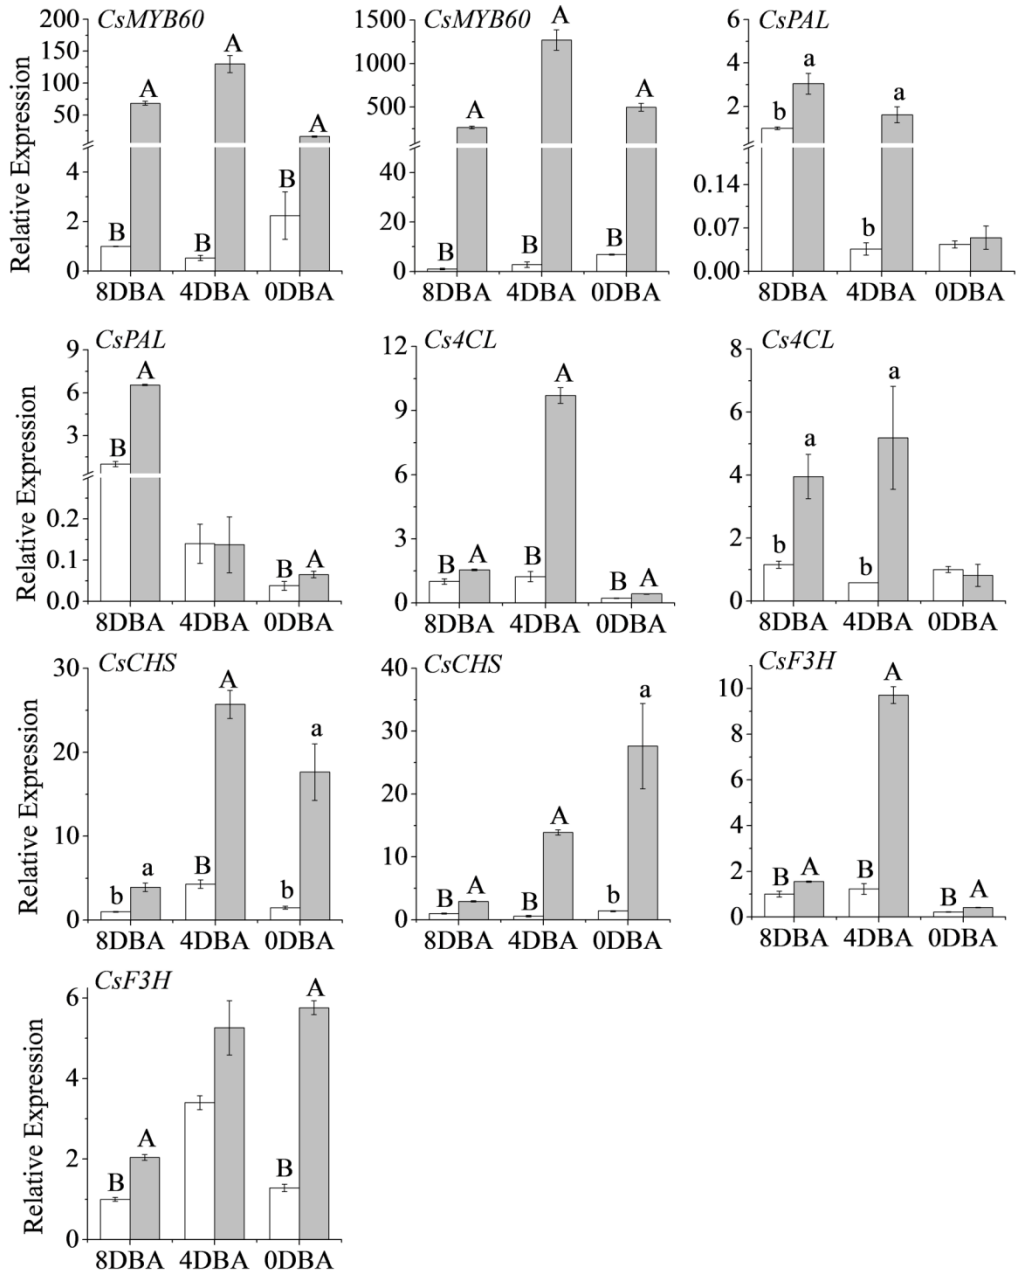

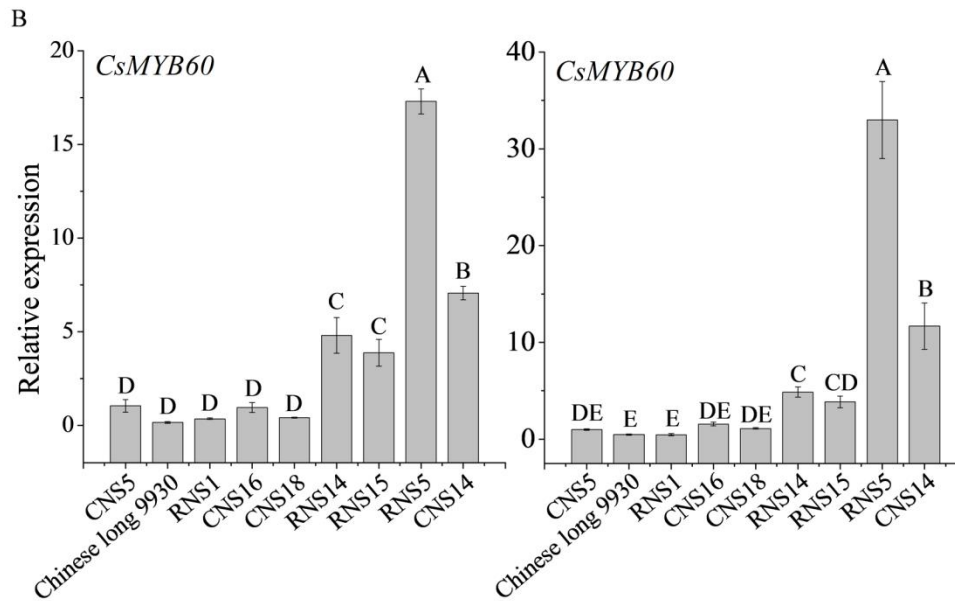

**Figure S9. Expression analysis of *CsMYB60* and key genes involved in flavonoid biosynthesis in cucumber spine.** (A) The other two biological repeats to determine the expression of key genes in spines at different developmental stages. qPCR was used to assess gene transcript accumulation in total RNA samples extracted from 8DBA, 4DBA, and 0DBA fruit spines. Capital and small letters indicate significant differences at  $q=0.01$  and  $q=0.05$ , respectively. (B) The expression of *CsMYB60* in fruit spines from different cucumber inbred lines. qPCR was used to assess *CsMYB60* transcript accumulation in total RNA samples extracted from fruit spine at 0DAA from different cucumber inbred lines. Different letters indicate significant differences at  $q=0.01$ .

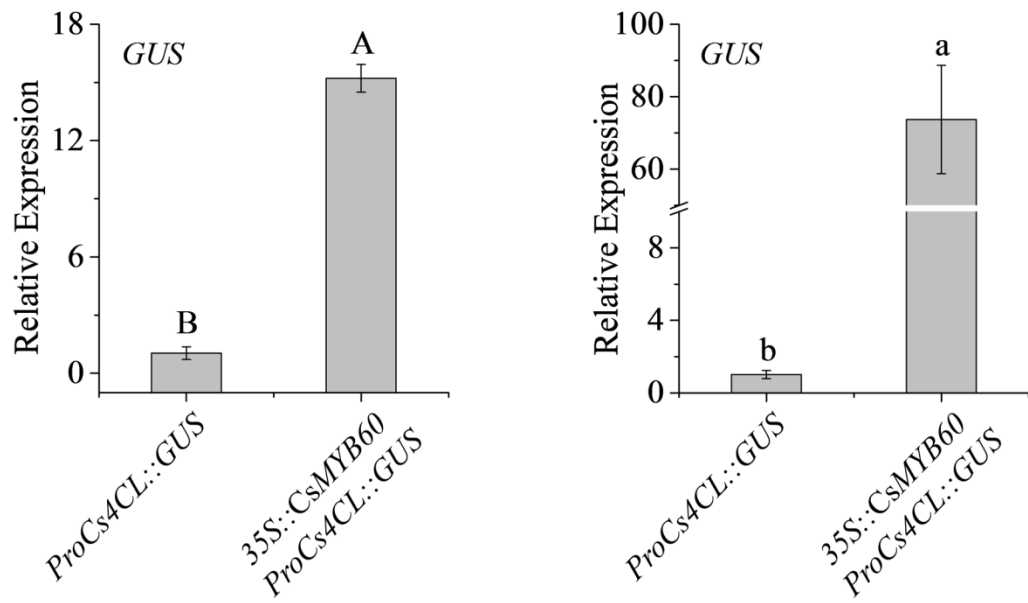

**Figure S10. Additional biological repeats to determine the relative expression of *GUS* in transiently transformed cucumber cotyledons.** Capital and small letters indicate significant differences at  $q=0.01$  and  $q=0.05$ , respectively.

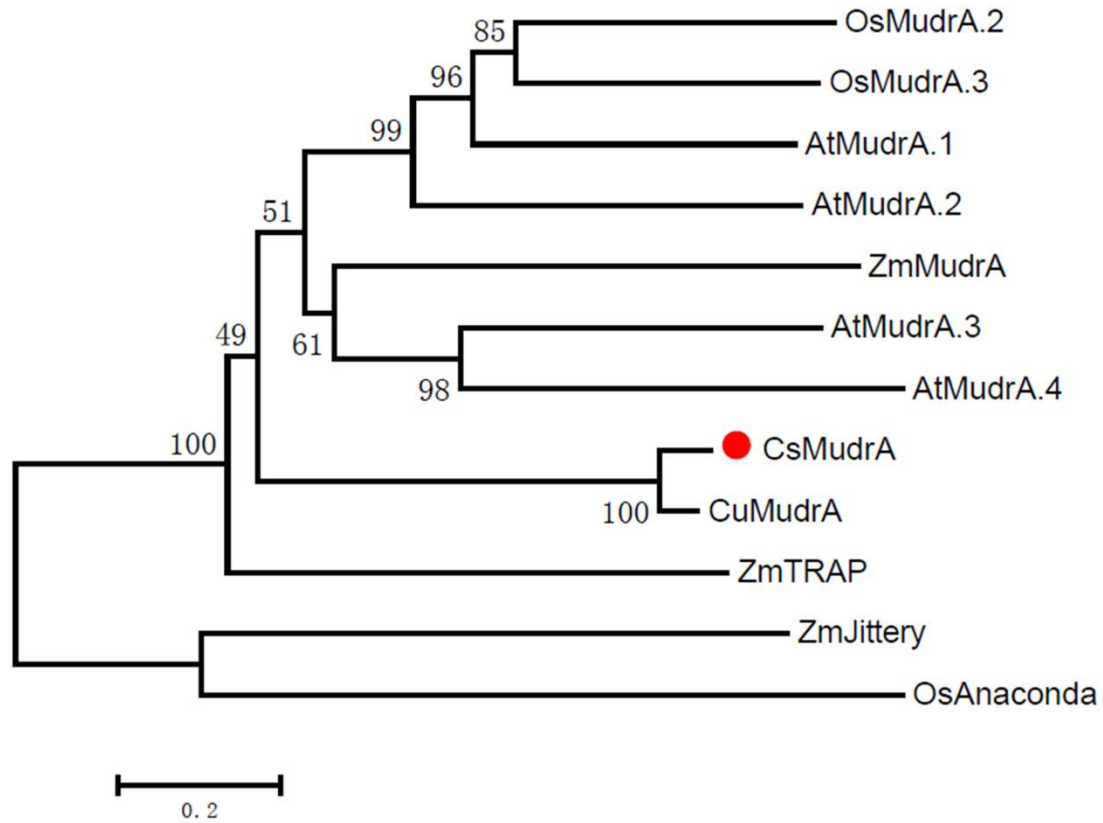

**Figure S11. Phylogenetic analysis of CsMudrA homologues in four species.** The phylogenetic tree was constructed by the neighbour-joining method with 1,000 bootstrap replicates using the software MEGA5.2. CsMudrA (AUS83695), ZmMudrA (AAA21566.1), CuMudrA (AAU04773), AtMudrA.1 (AAF26998.1), AtMudrA.2 (AAF63144.1), AtMudrA.3 (AAG51216.1), AtMudrA.4 (AAD50007.1), OsMudrA.2 (AP000366), OsMudrA.3 (AAK00423), OsMudrA.7 (AB023047), ZmJittery (AF247646.1), ZmTRAP (CAB51950.1), OsAnaconda (BAD26733).

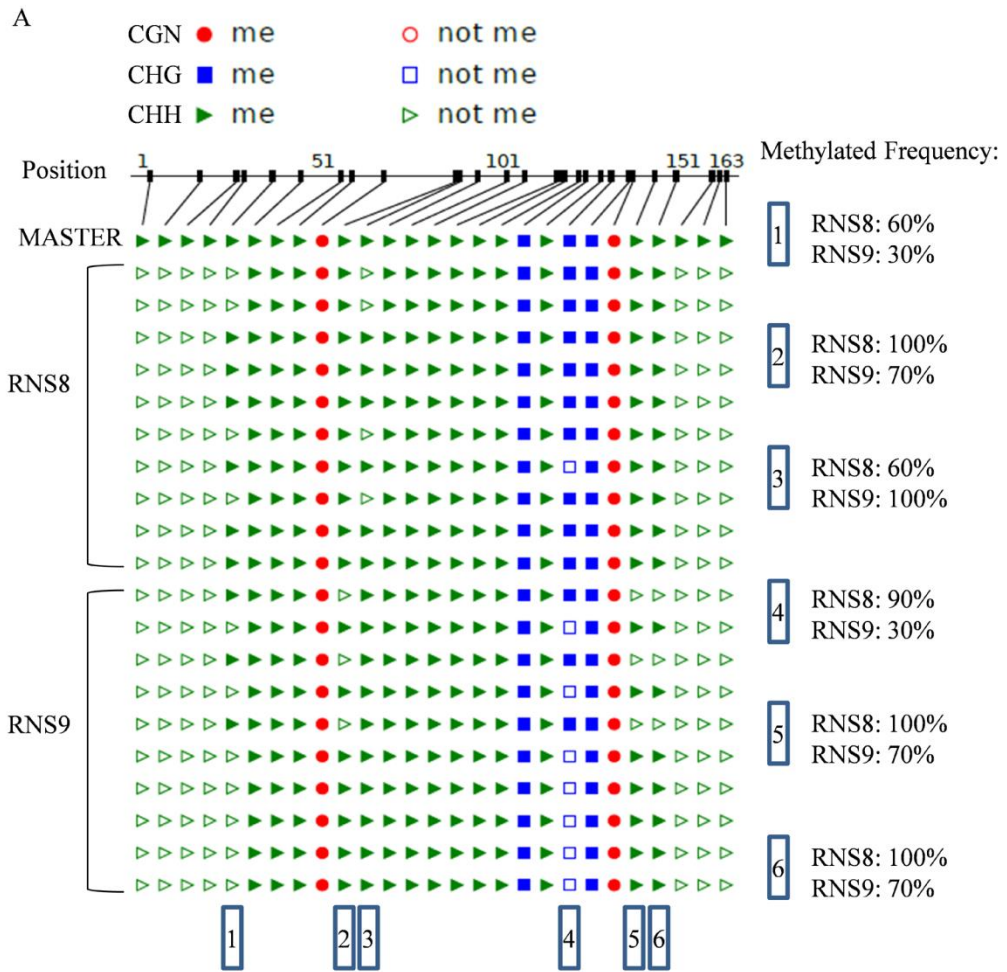



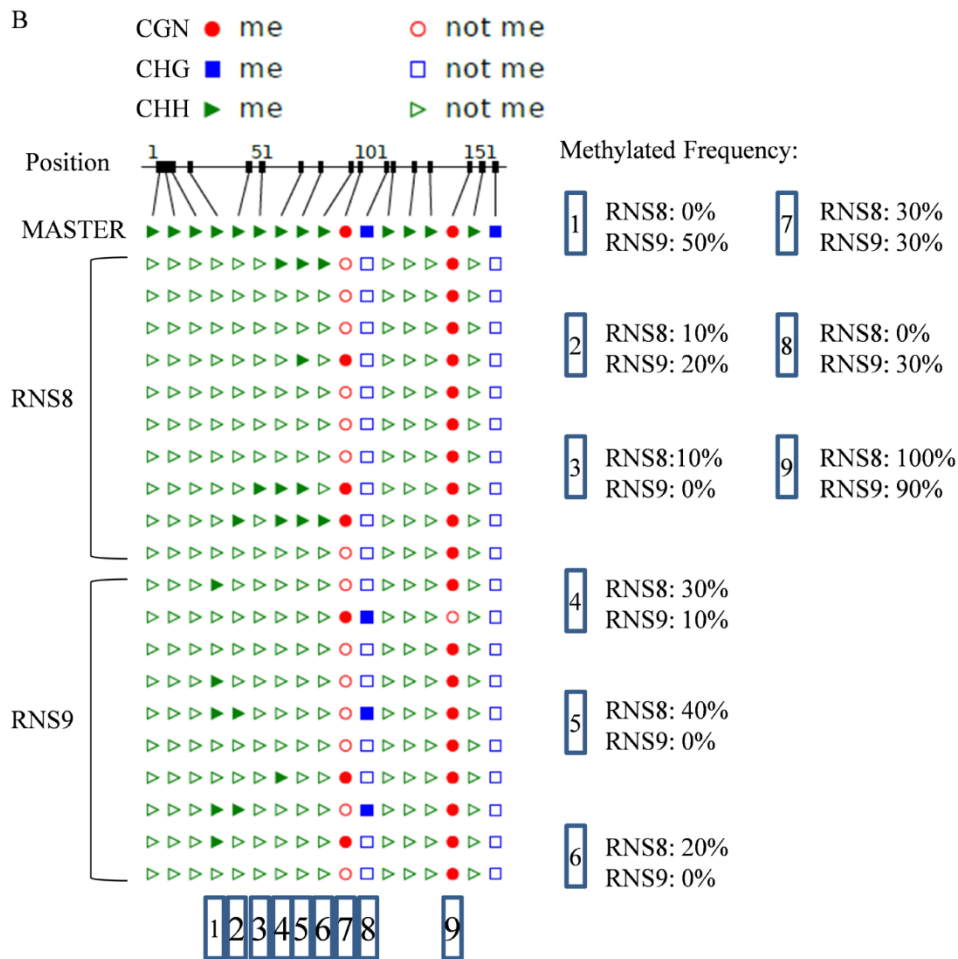

**Fig S12. DNA methylation status of the *CsMYB60* promoter in white-spined RNS8 and black-spined RNS9.** DNA methylation status of the promoter region at -4701 ~ -4514 (A) and at -3855 ~ -3692 (B) before the ATG of *CsMYB60* in RNS8 and RNS9. CyMATE generates images in which filled symbols represent cytosine methylation, while open symbols represent lack of methylation. The sequence context is distinguished by red circles for mCG, blue squares for mCHG and green triangles for mCHH. Numbers along the top show the length of the alignment.

**Table S1.** List of different metabolites between black spine and white spines, represented by the *m/z* ratio at the retention time.

| <b>2DAA</b>         | <b>12DAA</b>        |
|---------------------|---------------------|
| 276.2097@20.46193   | 398.3012@25.953728  |
| 630.1362@20.929388  | 726.4531@23.002153  |
| 423.3564@21.456627  | 365.3664@32.359375  |
| 398.3012@25.953728  | 330.2777@26.130033  |
| 363.3355@24.63563   | 328.0586@2.9477143  |
| 406.1835@0.87950003 | 644.4637@31.425533  |
| 365.3664@32.359375  | 505.3035@12.721153  |
| 255.2564@18.307486  | 448.1015@2.9386315  |
| 184.0586@0.56246877 | 642.2876@30.019318  |
| 242.1766@0.643826   | 432.1597@0.95737034 |
| 725.5228@33.091316  | 348.0828@1.465871   |
| 448.1015@2.9386315  | 479.4197@27.192999  |
| 636.2995@27.133514  | 756.2119@0.96800005 |
| 725.5238@33.563457  | 452.3376@12.717455  |
| 430.3779@28.847744  | 270.0079@4.5144854  |
| 432.1055@3.9819374  | 317.2335@21.695435  |
| 369.2881@23.721344  | 594.1588@0.97014284 |
| 414.2051@19.138916  | 970.5775@29.123001  |
| 263.2249@14.941636  | 724.3976@27.131472  |
| 794.186@0.96220005  | 371.1922@25.71919   |
| 798.5275@33.01426   | 559.379@30.216597   |
| 466.1454@2.2998095  | 669.4625@30.709164  |
| 479.1408@2.87715    | 393.3454@25.955215  |
| 423.3689@25.0232    | 753.5547@33.098606  |
| 309.3036@32.064     | 525.3665@13.085576  |
| 479.4197@27.192999  | 749.5447@28.21154   |
| 226.1688@1.3733715  | 602.4374@28.107466  |
| 317.2335@21.695435  | 585.4172@12.178799  |
| 594.1588@0.97014284 | 474.1501@16.988317  |
| 517.293@24.599049   | 516.3638@24.154408  |
| 601.426@25.940868   | 399.3118@28.355097  |
| 371.1922@25.71919   | 411.3122@28.592415  |
| 853.3062@0.559      | 290.1882@20.789616  |
| 370.0941@27.482521  | 423.2732@12.464642  |
| 669.4625@30.709164  | 676.2907@26.814833  |

|                    |                    |
|--------------------|--------------------|
| 749.5447@28.21154  | 331.3095@18.590708 |
| 474.1501@16.988317 | 398.1706@13.873478 |
| 399.3118@28.355097 | 408.3722@27.602257 |
| 411.3122@28.592415 | 514.1086@11.232097 |
| 710.487@31.87085   | 375.2057@17.642277 |
| 676.2907@26.814833 | 775.5652@23.48724  |
| 331.3095@18.590708 | 414.2042@18.405518 |
| 408.3722@27.602257 | 547.348@13.085242  |
| 747.5342@20.95924  | 717.5243@22.3265   |
| 463.4236@29.794134 | 954.562@30.693941  |
| 375.2057@17.642277 | 703.5085@21.017366 |
| 775.5652@23.48724  | 492.3475@20.708458 |
| 717.5243@22.3265   | 462.1165@1.0107999 |
| 443.3239@22.124155 | 576.3858@21.2004   |
| 561.3184@24.489128 | 307.2516@25.248465 |
| 545.3631@29.646957 | 548.0482@6.003176  |
| 307.2514@25.107574 | 307.2514@25.107574 |
| 697.9801@11.469866 | 611.4983@29.37587  |
| 740.3444@21.943619 | 745.5548@24.899467 |
| 743.5766@29.04291  | 628.468@32.522503  |
| 595.503@31.954365  | 718.4208@33.57063  |
| 859.6604@31.437416 | 596.4083@12.181243 |
| 579.5077@32.06768  | 950.1197@2.9444287 |
| 544.1918@7.0803127 | 740.3444@21.943619 |
| 268.2017@21.575787 | 743.4035@18.21896  |
| 422.3874@28.346727 | 359.3202@29.531563 |
| 429.2996@25.767586 | 348.1765@1.260111  |
| 697.4782@11.468454 | 685.5341@27.855764 |
| 743.4032@18.357578 | 579.5077@32.06768  |
| 342.3246@23.375374 | 678.3568@30.01017  |
| 380.1088@1.29955   | 641.3754@26.751968 |
| 576.1968@8.919818  | 544.1918@7.0803127 |
| 279.2565@20.572657 | 268.2017@21.575787 |
| 626.4531@32.893482 | 521.2456@2.0056248 |
| 683.5551@31.752697 | 290.2465@21.536907 |
| 585.4452@22.592545 | 690.3903@31.869884 |
| 651.4715@29.917004 | 512.1503@1.6769501 |

|                     |                     |
|---------------------|---------------------|
| 307.2723@21.538002  | 743.4032@18.357578  |
| 821.6013@33.007355  | 340.3092@22.026443  |
| 598.1089@22.45513   | 576.1968@8.919818   |
| 304.1497@1.0248519  | 626.4531@32.893482  |
| 613.4765@25.27374   | 683.5551@31.752697  |
| 294.2201@22.30163   | 576.9134@13.27525   |
| 583.4663@26.77866   | 598.1089@22.45513   |
| 668.4637@30.560095  | 632.1353@1.6414735  |
| 289.2621@17.575531  | 727.582@31.66572    |
| 643.1433@4.9128127  | 278.2251@25.452322  |
| 653.3251@27.1336    | 445.4135@25.198036  |
| 612.4763@29.86337   | 375.3119@25.169466  |
| 477.2865@20.053839  | 668.4637@30.560095  |
| 103.1001@0.63449997 | 352.0775@0.99924004 |
| 305.2571@11.5143585 | 380.145@2.1256666   |
| 634.4582@33.63487   | 643.1433@4.9128127  |
| 759.578@26.341267   | 375.3124@28.235136  |
| 571.43@21.199572    | 477.2865@20.053839  |
| 243.0256@2.94675    | 305.2571@11.5143585 |
| 210.0661@2.007889   | 634.4582@33.63487   |
| 285.3032@22.221169  | 395.3375@22.19403   |
| 317.2335@22.544165  | 321.2674@25.730852  |
| 492.1272@10.2553005 | 367.3068@19.737404  |
| 471.3108@12.716342  | 285.3034@19.777172  |
| 271.2512@17.8442    | 778.1932@0.96823066 |
| 317.2331@21.861158  | 357.2647@27.659376  |
| 452.3268@33.88443   | 918.2437@8.472      |
| 550.3485@23.40397   | 624.1698@1.2973334  |
| 312.2283@21.536627  | 218.1673@14.942709  |
| 255.2564@17.451374  | 202.1318@0.7055626  |
| 457.341@23.587116   | 271.2512@17.8442    |
| 356.2549@21.50263   | 333.2881@15.226371  |
| 407.302@28.847343   | 317.2331@21.861158  |
| 609.1769@30.307144  | 452.3268@33.88443   |
| 395.3256@21.456114  | 302.0432@5.9805765  |
| 439.3518@21.395517  | 109.0017@0.56326467 |
| 359.1819@21.943739  | 932.2592@10.480258  |

|                    |                    |
|--------------------|--------------------|
| 587.4036@13.276515 | 702.4469@33.569057 |
| 283.3247@24.258629 | 255.2564@17.451374 |
| 665.3627@30.001284 | 415.3488@22.94391  |
| 405.3466@17.6208   | 330.2773@26.589487 |
| 335.2844@27.654226 | 765.5238@22.911312 |
| 819.5869@31.532751 | 317.2337@22.015888 |
|                    | 457.341@23.587116  |
|                    | 356.2549@21.50263  |
|                    | 430.3782@29.224573 |
|                    | 407.302@28.847343  |
|                    | 609.1769@30.307144 |
|                    | 348.0826@1.7033157 |
|                    | 331.0601@4.8982997 |
|                    | 181.0059@4.514001  |
|                    | 262.0219@4.5150886 |
|                    | 404.1661@2.0072072 |
|                    | 358.227@11.472943  |
|                    | 482.1406@1.4592692 |
|                    | 261.2307@10.5396   |
|                    | 587.4036@13.276515 |
|                    | 383.3025@17.500656 |
|                    | 283.3247@24.258629 |
|                    | 610.1544@2.3019524 |
|                    | 301.2991@19.589973 |
|                    | 700.4871@11.476572 |
|                    | 273.2679@17.266771 |

Number@Number (e.g. [276.2097@20.46193](#)) means mass-to-charge ratio ( $m/z$ ) at retention time.

**Table S2.** Throughput of RNA-Seq.

| Sampling time | Samples | Total reads number | Total mapped reads | Mapped | GC percentage |
|---------------|---------|--------------------|--------------------|--------|---------------|
| 2 DAA         | RNS8-1  | 52269372           | 49250425           | 94.22% | 43.32%        |
|               | RNS8-2  | 56434978           | 53304601           | 94.45% | 43.42%        |
|               | RNS8-3  | 53951280           | 51415304           | 95.3%  | 43.41%        |
|               | RNS9-1  | 57677546           | 54172735           | 93.92% | 43.30%        |
|               | RNS9-2  | 70940836           | 66737681           | 94.08% | 43.39%        |
|               | RNS9-3  | 48002920           | 44930420           | 93.60% | 43.32%        |

**Table S3.** Primers used for PCR reactions.

| Name           | Sequence (5'-3')             |
|----------------|------------------------------|
| CsMYB60-F      | ATGGAGAGAGAGAGTGGTGGG        |
| CsMYB60-R      | TCCGATTCCGATTCCGCAAC         |
| Cs4CL-F        | ACGGATTGACAGAGACCG           |
| Cs4CL-R        | GAAACTCCGTCTCTTTGTACTC       |
| CsPAL-F        | AACTTGAAGAGCACTGTG           |
| CsPAL-R        | GGTGAAGTGTCCCATTAGAGG        |
| CsCHS-F        | GCTTAAAGATGTACCTGGCC         |
| CsCHS-R        | CAACACACACGCGCTTGAC          |
| CsF3H-F        | ATGACTTTTTCTCTCCACATC        |
| CsF3H-R        | CTCCGTCGGAAGACCAAAGAAC       |
| GUS-F          | ATGTTACGTCCTGTAGAAACCCCA     |
| GUS-R          | ACATACGGCGTGACATCGGCTTC      |
| Actin-F        | ATGGCCGATGCCGAGGATATT        |
| Actin-R        | CTTTTCTCTGTTAGCCTTTGGG       |
| ProCs4CL-F     | AAGCTTCAATTTCAACCCTAAAACCC   |
| ProCs4CL-R     | GGATCCAAAATGGGAATGGGATG      |
| CsMYB60-GUS-F  | GGATCCATGGGGAGAAGGCCGTGC     |
| CsMYB60-GUS-R  | GAGCTCTCATGACAAAAGCCAAGAAATC |
| CsMYB60-956-F  | ACAACCGACAGCATCCTT           |
| CsMYB60-956-R  | GGTATGTAACGAACCTGC           |
| CsMYB60-2010-F | TTTAGCCCTCCCACCATA           |
| CsMYB60-2010-R | GTGCTTAATGGCATGTGG           |
| CsMYB60-3236-F | GACACACCATCAATAGGG           |
| CsMYB60-3236-R | CCATCGTACACGTCCATT           |
| CsMYB60-4869-F | CTAATTCGTCAACCCCTC           |
| CsMYB60-4869-R | CAGACCAATCACAGCCTA           |
| CsMYB60-5695-F | AAATCCGGTCATTCCCCA           |

|                |                        |
|----------------|------------------------|
| CsMYB60-5695-R | CGGAACTGTTGTCAGTGA     |
| CsMYB60-6362-F | GCCACGAAAACCTACACA     |
| CsMYB60-6362-R | ACGCCCAATTCACAGAG      |
| CsMYB60-6002-F | GAATCGGGTAGATGGTGTG    |
| CsMYB60-6002-R | GCCCTTTGAGTGTAATCAATCC |
| CsMYB60-5469-F | GGATTGATTACACTCAAAGGGC |
| CsMYB60-5469-R | GCAGAGACTTCTTGAATAG    |
| CsMYB60-5124-F | CCCAAGGTTAGCACAACATC   |
| CsMYB60-5124-R | GGACCCTATTGTCCTTTTG    |
| CsMYB60-4567-F | CAAAGGACAATAGGGTCC     |
| CsMYB60-4567-R | GTTGTCAGTGATAGAGTC     |
| CsMYB60-4182-F | CACACACTTGGTGATATAG    |
| CsMYB60-4182-R | CAATCCAAACGTCCTCTTAG   |
| CsMYB60-4008-F | GCACAACATGAACATAGG     |
| CsMYB60-4008-R | TTGAAGAGCACTCAATAC     |
| CsMYB60-3674-F | CTAAGAGGACGTTTGGATTG   |
| CsMYB60-3674-R | GCATCTAACCATTGCTTG     |
| CsMYB60-3221-F | CTGCTAATTGTTTCAATA     |
| CsMYB60-3221-R | CCCTATTGATGGTGTGTC     |
| CsMYB60-3006-F | CAAGCAATGGTTAGATGC     |
| CsMYB60-3006-R | CAGACCAATCACAGCCTA     |
